# Supplementary material
Source: PubMed Central journal article supplement (PMC5394974)
Supplement: 2016_153932-Disclosures_and_Contributions.pdf [file 2016_153932-Disclosures_and_Contributions.pdf]

Haematologica  
HAEMATOL/2016/153932  
Version 4

Exome sequencing identified RPS15A as a novel causative gene for  
Diamond-Blackfan anemia

Fumika Ikeda, Kenichi Yoshida, Tsutomu Toki, Tamayo Uechi, Shiori Ishida, Yukari Nakajima, Yoji Sasahara, Yusuke Okuno, Rika Kanazaki, Kiminori Terui, Takuya Kamio, Akie Kobayashi, Takashi Fujita, Aiko Sato-Otsubo, Yuichi Shiraishi, Hiroko Tanaka, Kenichi Chiba, Hideki Muramatsu, Hitoshi Kanno, Shouichi Ohga, Akira Ohara, Seiji Kojima, Naoya Kenmochi, Satoru Miyano, Seishi Ogawa, and Etsuro Ito

Disclosures: This work was supported by Practical Research Project for Rare/Intractable Diseases (15ek0109133) and Grant-in-Aids (15ek0109099h001) from the Japan Agency for Medical Research and Development (AMED) and the Research on Measures for Intractable Diseases Project and Health and Labor Sciences Research grants (Research on Intractable Diseases) from the Ministry of Health, Labour and Welfare and JSPS KAKENHI Grant Numbers JP2591003, JP15K09656.

Contributions: YO, AS-O, YShiraishi, HT, KC and SM performed bioinformatics analyses of the resequencing data. FI, KY and TT processed and analyzed genetic material, prepared the library and performed sequencing. FI, TT, RK and AK performed the Northern blot analyses and RT-PCR analyses. FI, TT, TF and RK performed genome editing using CRISPR/Cas9 system. TU, SI, YN, and NK performed zebrafish experiments. YSasahara, KT, TK, HM, HK, SO, AOhga, SK, and EI collected specimens and were involved in planning the project. EI and SOgawa led the entire project. FI, NK and EI wrote the manuscript. All author participated in discussions and interpretation of the data and results.
